# Supplementary material for: Construction of a new membrane bed biofilm reactor and yttria-stabilized zirconia for removing heavy metal pollutants
Source: Royal Society of Chemistry journal article supplement (doi:10.1039/d3ra08262h), 2024-01-01
Supplement: d3ra08262h1.pdf [file d3ra08262h1.pdf]

### Supplementary file

Construction of a new membrane bed biofilm reactor and Ytria-stabilized zirconia for removing heavy metal pollutants

Table 1S

| Response                                                       | 1              | RE |             |         |                  |             |
|----------------------------------------------------------------|----------------|----|-------------|---------|------------------|-------------|
| ANOVA for Response Surface Quadratic Model                     |                |    |             |         |                  |             |
| Analysis of variance table [Partial sum of squares - Type III] |                |    |             |         |                  |             |
| Source                                                         | Sum of Squares | df | Mean Square | F Value | p-value Prob > F |             |
| Model                                                          | 7714.72        | 5  | 1542.94     | 32.88   | 0.0001           | significant |
| <i>A-pH</i>                                                    | 7489.79        | 1  | 7489.79     | 159.60  | < 0.0001         |             |
| <i>B-Contact time</i>                                          | 44.85          | 1  | 44.85       | 0.96    | 0.3609           |             |
| <i>AB</i>                                                      | 56.25          | 1  | 56.25       | 1.20    | 0.3098           |             |
| <i>A<sup>2</sup></i>                                           | 239.96         | 1  | 239.96      | 5.11    | 0.0582           |             |
| <i>B<sup>2</sup></i>                                           | 119.10         | 1  | 119.10      | 2.54    | 0.1552           |             |
| Residual                                                       | 328.51         | 7  | 46.93       |         |                  |             |
| <i>Lack of Fit</i>                                             | 328.51         | 3  | 109.50      |         |                  |             |
| <i>Pure Error</i>                                              | 0.000          | 4  | 0.000       |         |                  |             |
| Cor Total                                                      | 8043.23        | 12 |             |         |                  |             |
